# Supplementary material for: Synergistic Enhancement of Near-Infrared Emission in CsPbCl3 Host via Co-Doping with Yb3+ and Nd3+ for Perovskite Light Emitting Diodes
Source: MDPI journal article supplement (doi:10.3390/nano13192703), 2023-10-04
Supplement: s1 [file s1]

# Synergistic Enhancement of Near-Infrared Emission in CsPbCl<sub>3</sub> Host via Co-Doping with Yb<sup>3+</sup> and Nd<sup>3+</sup> for Perovskite Light Emitting Diodes

Muhammad Amin Padhiar <sup>1,2,3</sup>, Shaolin Zhang <sup>1,2,3\*</sup>, Minqiang Wang <sup>4</sup>, Noor Zamin Khan <sup>1,2</sup>, Shoaib Iqbal <sup>4</sup>, Yongqiang Ji <sup>4,5</sup>, Nisar Muhammad <sup>6</sup>, Syed Ali Khan <sup>7</sup> and Shusheng Pan <sup>1,2,3\*</sup>

<sup>1</sup>School of Physics and Materials Science, Guangzhou University, Guangzhou 510006, China;

amin.padhiar@gzhu.edu.cn (M.A.P.); noorzamin@mail.ustc.edu.cn (N.Z.K.)

<sup>2</sup>Research Center for Advanced Information Materials (CAIM), Huangpu Research and Graduate School of Guangzhou University, Guangzhou 510555, China

<sup>3</sup>Key Lab of Si-based Information Materials & Devices and Integrated Circuits Design, Department of Education of Guangdong Province

<sup>4</sup>Electronic Materials Research Laboratory, Key Laboratory of the Ministry of Education International Center for Dielectric Research Xi'an Jiaotong University, Xi'an 710049, China; mqwang@xjtu.edu.cn (M.W.).

shoaibiqbalxjtu@outlook.com (S.I.); yongqiangji@pku.edu.cn (Y.J.)

<sup>5</sup>State Key Laboratory for Artificial Microstructure and Mesoscopic Physics, School of Physics, Peking University, Beijing 100871, China

<sup>6</sup>Hefei National Research Center for Physical Sciences at the Microscale and Department of Physics, University of Science and Technology of China, Hefei 230026, China; lai-ba@mail.ustc.edu.cn

<sup>7</sup>Department of Chemistry and Chemical Engineering, Rutgers, The State University of New Jersey, 08854, USA; sayedali.khan@rutgers.edu

\*Correspondence: slzhang@gzhu.edu.cn (S.Z.); sspan@gzhu.edu.cn (S.P.)

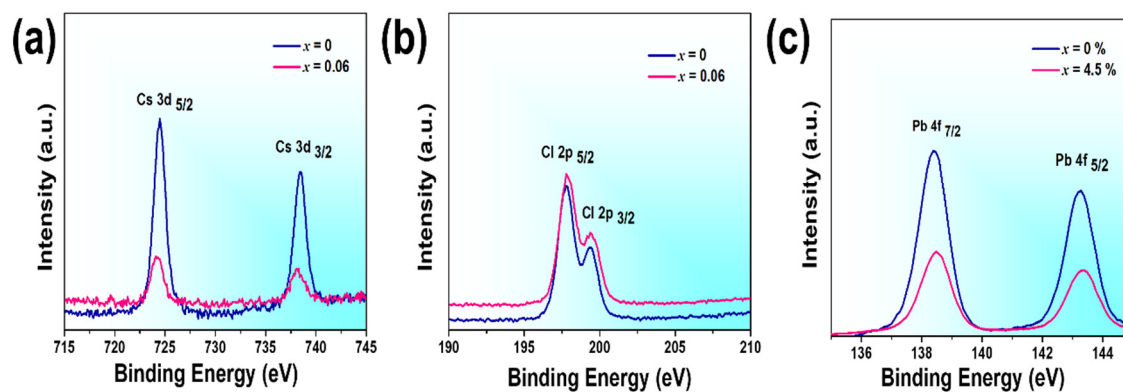

**Figure. S1** High resolution XPS graph of  $\text{CsPbCl}_3/\text{Yb}^{3+}/_x\text{Nd}^{3+}$  PeNCs ( $x = 0, 0.06$ ) with elements Cs, Cl and Pb respectively.

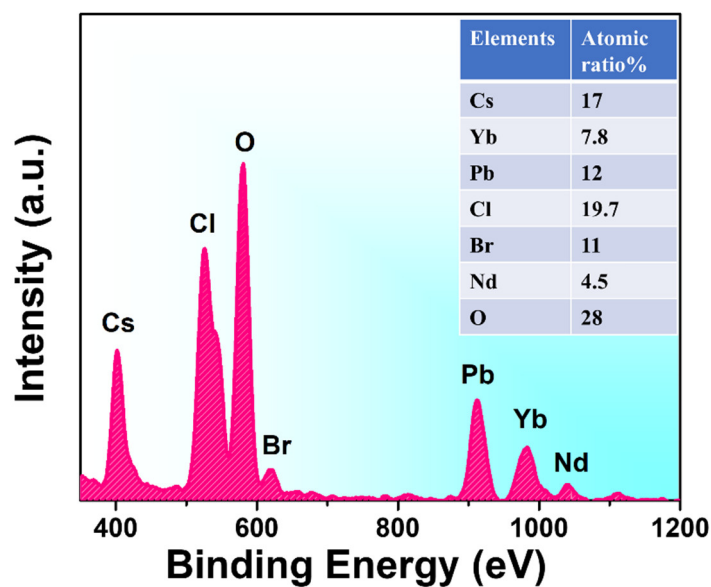

**Figure. S2** EDS graph with atomic percentage of each element present in  $\text{CsPbCl}_3/\text{Yb}^{3+}/_x\text{Nd}^{3+}$  PeNCs ( $x = 0.06$ ).

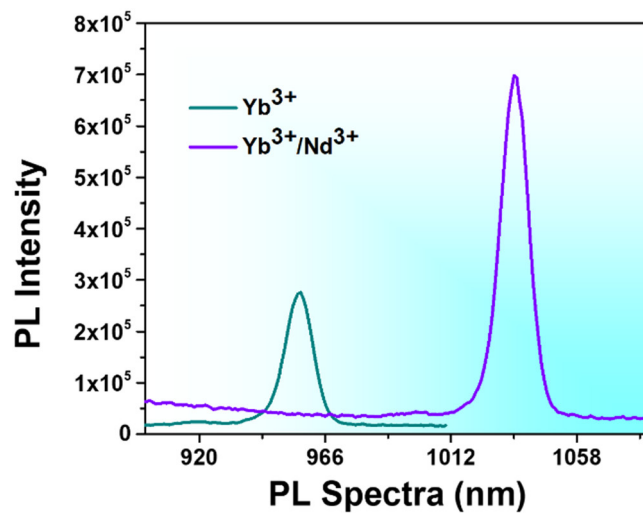

**Figure S3.** PL spectra of Single doped and Co-doped PeNCs ( $x=0, 0.06$ )

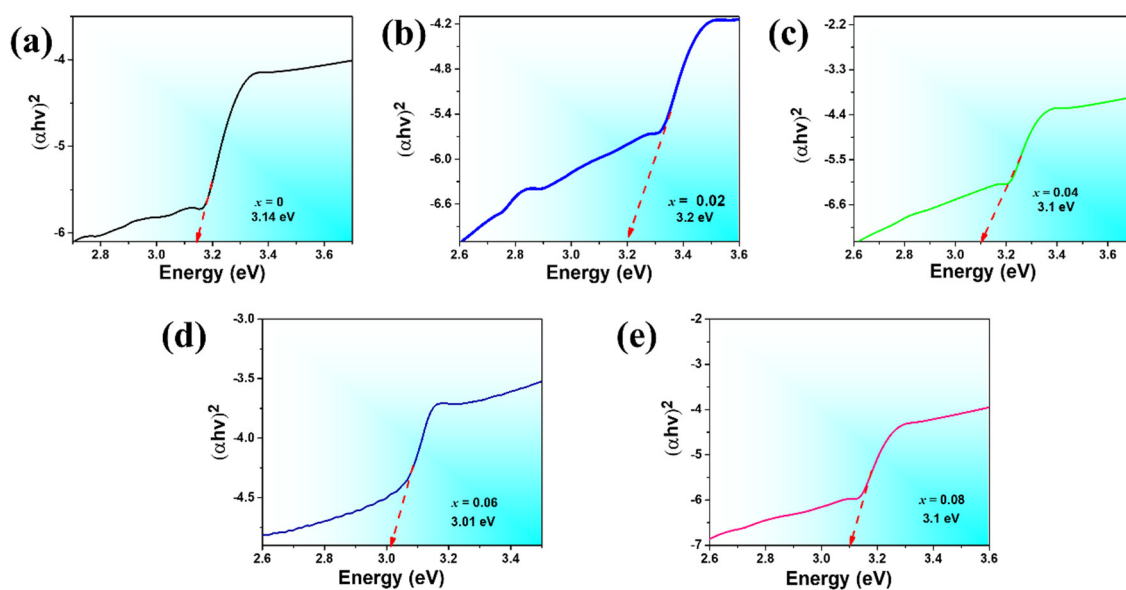

**Figure. S4** Tauc Plot representation showing bandgap of CsPbCl<sub>3</sub>/Yb<sup>3+</sup>/xNd<sup>3+</sup> PeNCs ( $x=0, 0.02, 0.04, 0.06, 0.08$ ) respectively.

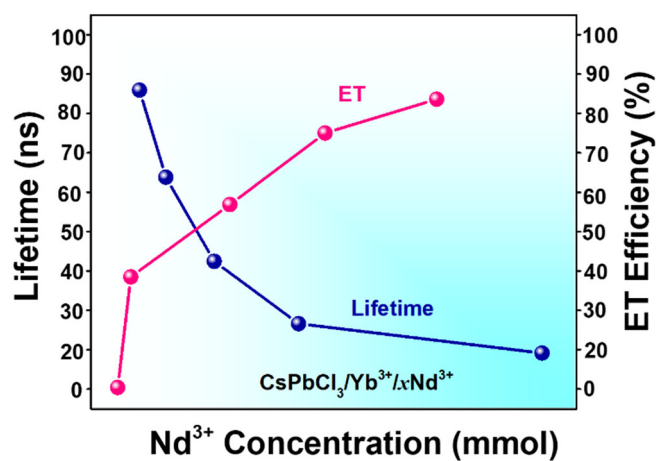

**Figure. S5** Lifetime and ET efficiency of CsPbCl<sub>3</sub>/Yb<sup>3+</sup>/xNd<sup>3+</sup> PeNCs ( $x=0, 0.02, 0.04, 0.06, 0.08$ )

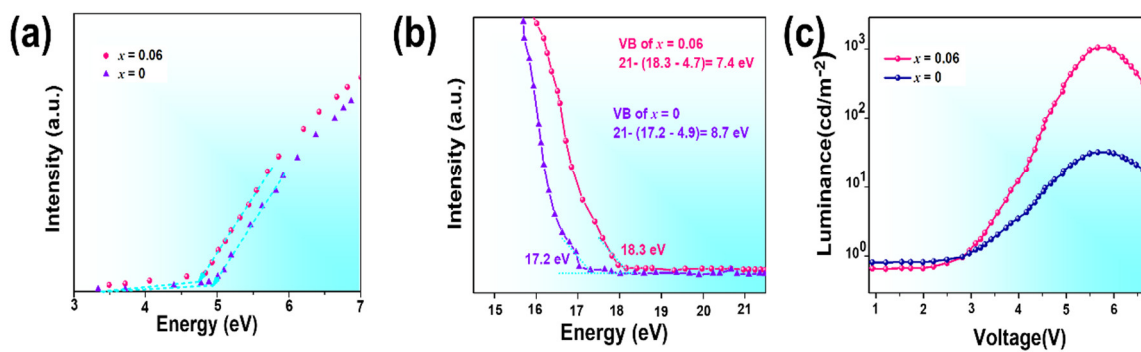

**Figure. S6** UPS spectra cut-off region(b) Band-edge region. (c) Luminance Intensity of PeNCs ( $x=0, 0.06$ )

**Table S1** Bi-exponential fitting results of the time resolved PL spectra of CsPbCl<sub>3</sub>/Yb<sup>3+</sup>/*x*Nd<sup>3+</sup> PeNCs treated by different contents of Nd<sup>3+</sup> (*x*=0, 0.02, 0.04, 0.06 and 0.08) respectively

| <i>x</i> = 0               | <i>x</i> = 0.02            | <i>x</i> = 0.4             | <i>x</i> = 0.06            | <i>x</i> = 0.08            |
|----------------------------|----------------------------|----------------------------|----------------------------|----------------------------|
| τ <sub>1</sub> =15.01 ns   | τ <sub>1</sub> =13.46 ns   | τ <sub>1</sub> =12.24 ns   | τ <sub>1</sub> =11.05 ns   | τ <sub>1</sub> =10.66 ns   |
| B <sub>1</sub> %=70.53     | B <sub>1</sub> %=88.64     | B <sub>1</sub> %=92.48     | B <sub>1</sub> %=95.44     | B <sub>1</sub> %=96.59     |
| τ <sub>2</sub> =121.2 ns   | τ <sub>2</sub> =86.2 ns    | τ <sub>2</sub> =79.25 ns   | τ <sub>2</sub> =76.23 ns   | τ <sub>2</sub> =74.64 ns   |
| B <sub>2</sub> %=30.45     | B <sub>2</sub> %=18.9      | B <sub>2</sub> %=15.46     | B <sub>2</sub> %=14.69     | B <sub>2</sub> %=11.82     |
| τ <sub>avg</sub> =47.48 ns | τ <sub>avg</sub> =28.22 ns | τ <sub>avg</sub> = 23.57ns | τ <sub>avg</sub> =21.73 ns | τ <sub>avg</sub> = 19.0 ns |
